# Supplementary material
Source: PubMed Central journal article supplement (PMC1735935)
Supplement: jmedgene_42_10_e63__1.pdf [file jmedgene_42_10_e63__1.pdf]

**Table S1. Primers and DHPLC conditions for alternate *PKHD1* exons**

| Exon                 | Size (bp) | Primer sequences            |                              | Genomic DNA nucleotide |        | DHPLC conditions |                    |
|----------------------|-----------|-----------------------------|------------------------------|------------------------|--------|------------------|--------------------|
|                      |           | Forward (5'-3')             | Reward (5'-3')               | From                   | To     | Temp.            | Initial % buffer B |
| 20a (20)             | 261       | GGATGTGGACTCCTCACTACG       | AATCCTCCCAGCTGACTGAA         | 33325                  | 33585  | 58.6, 62         | 56, 54             |
| 32a (32A)            | 353       | CCACAGGTGCTATGAATTC         | GTGACTACTGGTGTGCTG           | 61321                  | 61673  | 61, 63.7         | 57, 56             |
| 32a (32B)            | 365       | AAGGCTTCACTTTCATGTATGAA     | CCTCACAGTAAGTATGGTCC         | 61628                  | 61992  | 59, 60.6         | 61, 59             |
| 32b (32D)            | 367       | CTTCCTTGCAATGTAACTTTT       | GATACCAAAGTCCATCTACCTC       | 62332                  | 62698  | 57.9, 58.9       | 59, 59             |
| 32b (32E)            | 441       | CTCATCCGGTGCATTGTTC         | CCAGAAGTGAAAGGAGCTACCA       | 62626                  | 63066  | 58, 62           | 60, 55             |
| 32c (32E)            | 441       | CTCATCCGGTGCATTGTTC         | CCAGAAGTGAAAGGAGCTACCA       | 62626                  | 63066  | 58, 62           | 60, 55             |
| <b>38/38a (38.1)</b> | 327       | TGGGGTTTGGGTAGCTGTAG        | CCAAGGCCATGAGACTGTTT         | 157391                 | 157717 | 57.6, 59.6       | 58, 55             |
| <b>38/38a (38.2)</b> | 348       | GCAGGATGGTGGAGCTTTTA        | GCAGACACTTGGCATTTTCA         | 157589                 | 157936 | 56.3, 57         | 60, 59             |
| 39a/39b (38)         | 332       | AAATTATCTGGACAACTTTTCTC     | AGACCCCAATACAAATGTCCA        | 175001                 | 175332 | 59, 60.5         | 58, 56             |
| <b>39b (39.1)</b>    | 445       | GGTACTGAGTGTGAGCTTGGC       | CAGCCACCCAAATTCTCTGTAA       | 175247                 | 175691 | 54.9, 55.9       | 60, 59             |
| 39b (39)             | 278       | TTTGAGTGTGCTCAGTTCT         | GCAATGCCATCTATCATCAGAC       | 175612                 | 175889 | 57, 59.5         | 57, 55             |
| <b>39b (39.2)</b>    | 328       | CTCACTAATGAGAGGGAGAAGC      | TTCTTTAATAGAAATATTTTCCCCAGA  | 175757                 | 176084 | 57.3             | 57                 |
| 41a (40)             | 286       | CATGCTTTAGTTCTCTGGACTTT     | TGCCTTAAACATGGGAGAAA         | 178101                 | 178386 | 58.5, 60.5, 61.5 | 57, 56, 54         |
| <b>41a (41.1)</b>    | 400       | GAGCTATGAGAGGTAAGGGGGT      | CACAAAGCTAGTAAGTGGTAGAGAGACA | 178319                 | 178718 | 56.4             | 60                 |
| <b>41a (41.2)</b>    | 381       | GATTCTGGAACAGGCAGTCC        | TTCTGTTTTCTGATTCTGATCTTG     | 178598                 | 178978 | 57.8, 58.8       | 59, 58             |
| 44a (43)             | 258       | TCAAGGGTGTGAGTTGAGTACA      | TTGAGAAAGAACTTTATGCCCTC      | 183819                 | 184076 | 56.9, 58.9       | 56, 54             |
| 51a/51b (50)         | 300       | TGATGGGGTTCCTTACTAAATGA     | TGGTGATTCTGACTATGTGCTC       | 239591                 | 239890 | 58.3, 59.3, 60.3 | 57, 56, 55         |
| 60a (59)             | 285       | GTGGCTGGTGGTTTATATG         | GGGTTTGAAGAATTGCCAAG         | 340670                 | 340954 | 54.1, 57.4, 58.7 | 57, 55, 52         |
| <b>62.1</b>          | 378       | TGTCCTGAGACCTTTTTCTTC       | TAAAGGGAATGGTGAAGGTG         | 343981                 | 344358 | 55.7, 57.2       | 60, 58             |
| <b>62.2</b>          | 377       | CCTGGGAGTCATCTTTATTTTTTC    | CAAACGCCCTGATGTAGTGA         | 344268                 | 344644 | 55.5, 58.1       | 60, 57             |
| <b>62.3</b>          | 440       | CGCCTTTTACTTACTTATCCTGG     | CAGCAAACCTTCTGGCTGG          | 344570                 | 345009 | 54.7, 57.5       | 60, 57             |
| <b>63</b>            | 328       | CCACAGTCTGTTGGATGAAAAA      | TCTGGGTGAGTAGTTTTGTACG       | 346942                 | 347269 | 54.2, 56.5       | 58, 56             |
| <b>64.1</b>          | 341       | AAACTTGTGTTTAGAGAGAAAATTGTG | TCTCTTGAGACAGTGACCAGAA       | 405320                 | 405660 | 56.7, 57.2       | 58, 57             |
| <b>64.2</b>          | 323       | TTCTTGTCATCTTTGGTTGG        | GAGGTGGTGAACACTACAAGCCA      | 405578                 | 405900 | 57.5, 58         | 58.57              |
| <b>64.3</b>          | 349       | TGCGTATAGCTGTGTTCCAA        | TGAGTTAAAGAGAACACTGAAGGG     | 405815                 | 406163 | 55.8, 56.7, 58.5 | 58, 57, 55         |
| <b>64.4</b>          | 339       | CATGCTTGATTAAGGCTACTGG      | TTCAGTCTGTGGAATGTCA          | 406098                 | 406436 | 56, 57.2, 58.8   | 59, 58, 56         |
| <b>64.5</b>          | 326       | AAGCTGATCTTGGGAAAGGA        | GAACCAGTAGGGGACAGAA          | 406365                 | 406690 | 56.1, 57.4       | 58, 57             |
| <b>64.6</b>          | 346       | AACCCCAATTCACAACCAAC        | TGGACAGTAATCAACATGAACAA      | 406630                 | 406975 | 53.5, 55.5       | 58, 56             |
| 66a (62)             | 273       | AATGGATTGTGGAAAATTGCT       | GGCTGAATGCTACATGCTACTT       | 438315                 | 438587 | 55.3, 57.3       | 56, 55             |
| 71a (67B)            | 394       | TGCAAGAGACTGGGAAGTGG        | CTGGGAACATTCTGCCTTTC         | 468285                 | 468678 | 61.1, 62.4       | 57, 56             |

GenBank NM\_138694.2, AY129465

Primers of the longest *PKHD1* ORF amplifying (parts of) alternate exons are given in parentheses.

Predicted exons not included in the longest ORF are shown in bold type.
