# Supplementary material
Source: PubMed Central journal article supplement (PMC1735935)
Supplement: jmedgene_42_10_e63__2.pdf [file jmedgene_42_10_e63__2.pdf]

**Table S2. Primers Quantitative Real-Time PCR**

| Fragment                | Size (bp) | Primer sequences         |                         | Genomic DNA nucleotide |        |
|-------------------------|-----------|--------------------------|-------------------------|------------------------|--------|
|                         |           | Forward (5'-3')          | Reward (5'-3')          | From                   | To     |
| 4                       | 118       | TTACCCCAACAATGGCTCTCA    | CACCACAGGCAAATCCAAGAA   | 5049                   | 5166   |
| 8                       | 155       | TCAGCCTTGGTCTGGGATAC     | CATGGCTCATGCTTTCACAC    | 15044                  | 15198  |
| 27                      | 102       | CCATCAGTGCCACTGGAGAA     | AGACCCTCCCAGATTACCAA    | 44630                  | 44731  |
| 34                      | 143       | TGTTTCCTGCAGTGTCTTG      | GAGGTAAGGCCACGATTCAA    | 69931                  | 70073  |
| 35                      | 121       | TTGTCAGCCAGGAGACTG       | ATCAGCAAGTTGGAACACCC    | 123260                 | 123380 |
| 38                      | 111       | AACTGCCCATGCCCTAGACA     | ATCGGTTTGGCACCTTTAACA   | 175074                 | 175184 |
| 46                      | 155       | AAGCTACAGGAAGTCCGCAA     | TTGCATCACTTTCCAAGACG    | 204319                 | 204473 |
| 50                      | 94        | GTGGGAGTCGAGTGGGTCTGT    | AGTTGCCTCAGCTGGCTATTG   | 239734                 | 239827 |
| 53                      | 86        | ATGTTCTGAGTGTGGCATGCA    | CTCAACATGCTCGCAATCCTT   | 296327                 | 296412 |
| 58                      | 110       | ATCAACCTCCATGGCAACGT     | GAATGCGCCACATTGTCAGA    | 339262                 | 339371 |
| 65                      | 123       | ATCCAAGCCATTTGCTGTCT     | TTAAGCCAACAGCACACCAG    | 454909                 | 455031 |
| 67                      | 134       | GGCAAAGTCGGCTGAGTAAG     | CCCTGATCACAGTTGCTCCT    | 468405                 | 468538 |
| Factor VIII<br>(exon 3) | 87        | CTACCATCCAGGCTGAGGTTTATG | CACCAACAGCATGAAGACTGACA |                        |        |

GenBank NM\_138694.2, AY129465
